# Supplementary material for: The potential neuroprotective role ofAmphora coffeaeformisalgae against monosodium glutamate-induced neurotoxicity in adult albino rats
Source: Royal Society of Chemistry journal article supplement (doi:10.1039/d0fo01957g), 2020-11-25
Supplement: d0fo01957g1.pdf [file d0fo01957g1.pdf]

## Supplementary materials

### ***Amphora Coffeaeformis* Algal**

#### ***Acetone Algal Extract***

Algal biomass was homogenized in acetone solution (95%) and then kept overnight at 4 °C in the dark [1]. The bleached algal cells were obtained through several repetitions of the extraction steps. Consequently, the extract was centrifuged at 10,000 rpm for 5 min and then filtered. Next, algal extracts were filtered and then dried entirely by the evaporation under vacuum at 40 °C [2].

#### ***Determination of Fatty Acids***

**Methylation of fatty acids:** The fatty acids were converted to methyl esters using methyl alcohol solution. Specifically, methyl alcohol solution was prepared using a 3% sulfuric acid in methanol (a 3 mL of H<sub>2</sub>SO<sub>4</sub> was added to 97 mL methanol). The obtained oil extract was refluxed at 90 °C for 3 hours and re-extracted with *n*-hexane. Besides, the extract was then kept overnight with sodium sulfate and then concentrated by a rotary evaporator before the injection into Gas Chromatography (GC). Perkin Elmer Auto System XL GC equipped with flame ionization detector (FID), fused silica capillary column DB-5 (60 x 0.32 mm) was used to measure unsaturated and saturated fatty acids. Particularly, oven temperature in GC was initially maintained at 150 °C and then programmed at a ramping rate of 3 °C min<sup>-1</sup> from 150 to 240 °C. The GC was preconditioned and maintained at 230 °C injector temperature, 250 °C detector temperature, and a flow rate of helium (carrier gas) at 1 mL min<sup>-1</sup>.

#### **Neurobehavioral Assessment:**

##### **Barnes maze (BM)**

**Apparatus & settings:** A circular black colored wooden arena about 150 cm in diameter and 19 holes (each is 10 cm in diameter) was used. The arena was set 50 cm high from the floor with a source of light directly centered above it. The holes were secured by false bottoms to avoid the escape and falling of animals out of the maze. The wooden escape cage is (25\* 19 in diameter) was placed at the same place all over the experiment. Black cues (2 black cues 50 cm length and 5 cm in diameter) were placed at the same place, all over the experiment, on the wall directly next to the maze. The experimenter chair was set about 122 cm from the nearest rim of the maze. Cardboard with the number of each rat and its group

was used to allow the later offline analysis of the recorded videos. The arena and the box were cleaned with 70% ethanol to avoid odor cues.

**Experiment:** the experiment was done throughout 4 days: initial training day (to allow the animal to acclimate to the arena), 2 training days (to allow the animal to learn the site of the escape box) and a probe day (to test the reference memory and learning). The animals were placed in the examination room in their home cages 1 hour before the experiment. At the beginning of each trial, the direct light above the maze is turned on. Next, white noise is turned on to mask the surrounding sounds, and a digital camera is used to record the experiment. The time of the beginning of the procedures was recorded manually by the experimenter, and a stopwatch was used to count down the time allowed for the rat. Animals were allowed to explore the arena for 5 minutes on each training day. The rats were placed at the center of the arena and covered with a container (20 cm in diameter, 30 cm in height). At the first training trial only, the container was transparent to allow the animal to see the arena. After that, a dark container was used throughout the experiment. After 15 seconds, the container was removed, and the animals were allowable to explore the arena freely. If the rat did not find the escape box, it was guided by the experimenter. Animals were left in the escape box for 2 minutes to acclimate. The training was repeated 2 times in each training day with at least 15 minutes apart between the trials. In the probe day (the fourth day of the experiment), the same procedures were repeated. However, the escape box is closed by a false bottom and the time taken by the animals to reach the site of the box was recorded by the experimenter.

**Analysis of the results:** offline analysis was done through the recorded videos. The time elapsed to reach the box (latency), the number of errors (nose dipping in wrong holes), and the number of quadrants visited by the animals were analyzed [3].

### **Open Field Maze (OFM)**

This test was used to assess anxiety-like behavior and motor activity of animals.

**Apparatus & settings:** A white cubic arena made of nonporous plastic material was used. Its dimensions were 100\*100 cm in length for the floor, and the walls were 35 cm in height. The floor of the arena was divided into even grids using an oil-based marker pen; each is 5\*5 cm in diameter. The central area was marked in red color (25\*25 cm in diameter).

**Experiment:** The test protocol was according to the guidelines of [4]. The animals were brought to the test room one hour before the beginning of the test to acclimate. The room was lit with an upright even

light to avoid the escape of the animal to the unlit portion of the arena. The animals were placed in the center of the arena and allowed for free movement for 10 minutes. The movement and behavior of each animal across the arena were videos recorded by a digital camera for later offline analysis. The experimenter recorded the number and group of tested subjects manually. The subjects were returned to their home cages at the end of the test, and then the fecal pellets were counted. The arena was cleaned after each test trial.

**Analysis of the results:** The parameters used to assess the animal performance in OFM were: number of lines crossed by the animal, visits of the center zone, grooming, rearing behavior, number of fecal pellets, and passage of urine [5].

### Target Gene Expression by Real Time PCR:

Table (SI) thermal cycling protocol for StepOne™ Real-Time PCR System

| Step                        | Temperature | Time   | Number of cycles |
|-----------------------------|-------------|--------|------------------|
| <i>Initial denaturation</i> | 95°C        | 10 min | 1                |
| <i>Denaturation</i>         | 95°C        | 15 S   | 40               |
| <i>Annealing</i>            | 56°C        | 30 S   |                  |
| <i>Extension</i>            | 72°C        | 30 S   |                  |

\*It was followed by a melting curve analysis to exclude primer dimer

❖ **Gene Set Enrichment Analysis according to String database:**

**Table (SII): Enrichment of molecular function of four target gene products:**

| <b>Go term ID</b> | <b>Molecular function</b>                 | <b>observed gene count</b> | <b>matching proteins in your network (labels)</b> |
|-------------------|-------------------------------------------|----------------------------|---------------------------------------------------|
| GO:0005102        | signaling receptor binding                | 4                          | Bdnf,Grin2b,Grm5,Ntrk2                            |
| GO:0008066        | glutamate receptor activity               | 2                          | Grin2b,Grm5                                       |
| GO:1990782        | protein tyrosine kinase binding           | 2                          | Grm5,Ntrk2                                        |
| GO:0004888        | transmembrane signaling receptor activity | 3                          | Grin2b,Grm5,Ntrk2                                 |
| GO:0005126        | cytokine receptor binding                 | 2                          | Bdnf,Grin2b                                       |
| GO:0001664        | G protein-coupled receptor binding        | 2                          | Grin2b,Grm5                                       |
| GO:0046983        | protein dimerization activity             | 2                          | Grin2b,Ntrk2                                      |

**Table (SIII): Enrichment of cellular component of four target gene products**

| <b>GO term ID</b> | <b>Cellular component</b>             | <b>observed gene count</b> | <b>matching proteins in your network (labels)</b> |
|-------------------|---------------------------------------|----------------------------|---------------------------------------------------|
| GO:0098793        | presynapse                            | 4                          | Bdnf,Grin2b,Grm5,Ntrk2                            |
| GO:0098794        | postsynapse                           | 4                          | Bdnf,Grin2b,Grm5,Ntrk2                            |
| GO:0030425        | dendrite                              | 4                          | Bdnf,Grin2b,Grm5,Ntrk2                            |
| GO:0043679        | axon terminus                         | 3                          | Bdnf,Grin2b,Ntrk2                                 |
| GO:0043197        | dendritic spine                       | 3                          | Grin2b,Grm5,Ntrk2                                 |
| GO:0014069        | postsynaptic density                  | 3                          | Grin2b,Grm5,Ntrk2                                 |
| GO:0043025        | neuronal cell body                    | 3                          | Bdnf,Grin2b,Ntrk2                                 |
| GO:0043195        | terminal bouton                       | 2                          | Bdnf,Grin2b                                       |
| GO:0042734        | presynaptic membrane                  | 2                          | Grin2b,Grm5                                       |
| GO:0005887        | integral component of plasma membrane | 3                          | Grin2b,Grm5,Ntrk2                                 |
| GO:0043204        | perikaryon                            | 2                          | Bdnf,Ntrk2                                        |
| GO:0044425        | membrane part                         | 4                          | Bdnf,Grin2b,Grm5,Ntrk2                            |
| GO:0044422        | organelle part                        | 4                          | Bdnf,Grin2b,Grm5,Ntrk2                            |
| GO:0045211        | postsynaptic membrane                 | 2                          | Grin2b,Grm5                                       |
| GO:0009986        | cell surface                          | 2                          | Grin2b,Ntrk2                                      |
| GO:0005622        | intracellular                         | 4                          | Bdnf,Grin2b,Grm5,Ntrk2                            |
| GO:0031410        | cytoplasmic vesicle                   | 2                          | Bdnf,Ntrk2                                        |
| GO:0005576        | extracellular region                  | 2                          | Bdnf,Grin2b                                       |
| GO:0044444        | cytoplasmic part                      | 3                          | Bdnf,Grin2b,Ntrk2                                 |

**Table (SIV): Enrichment of biological process of four target gene products:**

| Go term ID | Biological process                                               | observed gene count | matching proteins in your network (labels) |
|------------|------------------------------------------------------------------|---------------------|--------------------------------------------|
| GO:0048169 | regulation of long-term neuronal synaptic plasticity             | 3                   | Bdnf,Grin2b,Grm5                           |
| GO:0050804 | modulation of chemical synaptic transmission                     | 4                   | Bdnf,Grin2b,Grm5,Ntrk2                     |
| GO:0007612 | learning                                                         | 3                   | Bdnf,Grin2b,Ntrk2                          |
| GO:0001932 | regulation of protein phosphorylation                            | 4                   | Bdnf,Grin2b,Grm5,Ntrk2                     |
| GO:0032270 | positive regulation of cellular protein metabolic process        | 4                   | Bdnf,Grin2b,Grm5,Ntrk2                     |
| GO:0048170 | positive regulation of long-term neuronal synaptic plasticity    | 2                   | Bdnf,Grm5                                  |
| GO:2000324 | positive regulation of glucocorticoid receptor signaling pathway | 2                   | Bdnf,Ntrk2                                 |
| GO:0007166 | cell surface receptor signaling pathway                          | 4                   | Bdnf,Grin2b,Grm5,Ntrk2                     |
| GO:0009612 | response to mechanical stimulus                                  | 3                   | Bdnf,Grin2b,Ntrk2                          |
| GO:0010647 | positive regulation of cell communication                        | 4                   | Bdnf,Grin2b,Grm5,Ntrk2                     |
| GO:0023056 | positive regulation of signaling                                 | 4                   | Bdnf,Grin2b,Grm5,Ntrk2                     |
| GO:0010996 | response to auditory stimulus                                    | 2                   | Bdnf,Ntrk2                                 |
| GO:0007268 | chemical synaptic transmission                                   | 3                   | Bdnf,Grin2b,Grm5                           |
| GO:0007399 | nervous system development                                       | 4                   | Bdnf,Grin2b,Grm5,Ntrk2                     |
| GO:0007616 | long-term memory                                                 | 2                   | Grin2b,Ntrk2                               |
| GO:0009966 | regulation of signal transduction                                | 4                   | Bdnf,Grin2b,Grm5,Ntrk2                     |
| GO:0050769 | positive regulation of neurogenesis                              | 3                   | Bdnf,Grm5,Ntrk2                            |
| GO:0071363 | cellular response to growth factor stimulus                      | 3                   | Bdnf,Grin2b,Ntrk2                          |
| GO:0043408 | regulation of MAPK cascade                                       | 3                   | Grin2b,Grm5,Ntrk2                          |
| GO:0065009 | regulation of molecular function                                 | 4                   | Bdnf,Grin2b,Grm5,Ntrk2                     |
| GO:0007215 | glutamate receptor signaling pathway                             | 2                   | Grin2b,Grm5                                |
| GO:0034097 | response to cytokine                                             | 3                   | Bdnf,Grin2b,Ntrk2                          |
| GO:0001934 | positive regulation of protein phosphorylation                   | 3                   | Bdnf,Grm5,Ntrk2                            |
| GO:0051966 | regulation of synaptic transmission, glutamatergic               | 2                   | Grm5,Ntrk2                                 |
| GO:0006952 | defense response                                                 | 3                   | Bdnf,Grin2b,Ntrk2                          |
| GO:0021987 | cerebral cortex development                                      | 2                   | Grin2b,Ntrk2                               |
| GO:0051602 | response to electrical stimulus                                  | 2                   | Bdnf,Grin2b                                |
| GO:0065008 | regulation of biological quality                                 | 4                   | Bdnf,Grin2b,Grm5,Ntrk2                     |
| GO:1990090 | cellular response to nerve growth factor stimulus                | 2                   | Bdnf,Ntrk2                                 |
| GO:0016310 | phosphorylation                                                  | 3                   | Bdnf,Grm5,Ntrk2                            |
| GO:0060079 | excitatory postsynaptic potential                                | 2                   | Bdnf,Grin2b                                |
| GO:0009967 | positive regulation of signal transduction                       | 3                   | Bdnf,Grm5,Ntrk2                            |
| GO:0043524 | negative regulation of neuron apoptotic process                  | 2                   | Bdnf,Ntrk2                                 |
| GO:0050770 | regulation of axonogenesis                                       | 2                   | Bdnf,Ntrk2                                 |
| GO:0072347 | response to anesthetic                                           | 2                   | Bdnf,Grin2b                                |
| GO:0044093 | positive regulation of molecular function                        | 3                   | Bdnf,Grin2b,Grm5                           |
| GO:0071356 | cellular response to tumor necrosis factor                       | 2                   | Bdnf,Ntrk2                                 |

|            |                                                                  |   |                   |
|------------|------------------------------------------------------------------|---|-------------------|
| GO:0071495 | cellular response to endogenous stimulus                         | 3 | Bdnf,Grin2b,Ntrk2 |
| GO:0050806 | positive regulation of synaptic transmission                     | 2 | Grin2b,Ntrk2      |
| GO:0043200 | response to amino acid                                           | 2 | Bdnf,Grin2b       |
| GO:0010941 | regulation of cell death                                         | 3 | Bdnf,Grin2b,Ntrk2 |
| GO:0009416 | response to light stimulus                                       | 2 | Bdnf,Ntrk2        |
| GO:0050790 | regulation of catalytic activity                                 | 3 | Grin2b,Grm5,Ntrk2 |
| GO:0007169 | transmembrane receptor protein tyrosine kinase signaling pathway | 2 | Bdnf,Ntrk2        |
| GO:0007204 | positive regulation of cytosolic calcium ion concentration       | 2 | Grin2b,Grm5       |
| GO:0043410 | positive regulation of MAPK cascade                              | 2 | Grm5,Ntrk2        |
| GO:0006954 | inflammatory response                                            | 2 | Bdnf,Ntrk2        |
| GO:0001666 | response to hypoxia                                              | 2 | Bdnf,Grin2b       |
| GO:0010468 | regulation of gene expression                                    | 3 | Bdnf,Grm5,Ntrk2   |
| GO:0007568 | aging                                                            | 2 | Bdnf,Ntrk2        |
| GO:0010038 | response to metal ion                                            | 2 | Bdnf,Grin2b       |
| GO:0048666 | neuron development                                               | 2 | Bdnf,Ntrk2        |
| GO:0071407 | cellular response to organic cyclic compound                     | 2 | Bdnf,Grin2b       |
| GO:0071417 | cellular response to organonitrogen compound                     | 2 | Bdnf,Grin2b       |
| GO:0006468 | protein phosphorylation                                          | 2 | Grm5,Ntrk2        |
| GO:0048523 | negative regulation of cellular process                          | 3 | Bdnf,Grm5,Ntrk2   |
| GO:1903530 | regulation of secretion by cell                                  | 2 | Grin2b,Ntrk2      |
| GO:0031667 | response to nutrient levels                                      | 2 | Bdnf,Grin2b       |
| GO:0051336 | regulation of hydrolase activity                                 | 2 | Grin2b,Ntrk2      |
| GO:0043085 | positive regulation of catalytic activity                        | 2 | Grin2b,Grm5       |
| GO:1901564 | organonitrogen compound metabolic process                        | 3 | Bdnf,Grm5,Ntrk2   |
| GO:1901701 | cellular response to oxygen-containing compound                  | 2 | Bdnf,Grin2b       |
| GO:0035556 | intracellular signal transduction                                | 2 | Grin2b,Grm5       |
| GO:0033993 | response to lipid                                                | 2 | Bdnf,Grin2b       |
| GO:0009725 | response to hormone                                              | 2 | Bdnf,Grin2b       |
| GO:0044238 | primary metabolic process                                        | 3 | Bdnf,Grm5,Ntrk2   |
| GO:0006355 | regulation of transcription, DNA-templated                       | 2 | Bdnf,Grm5         |
| GO:0051252 | regulation of RNA metabolic process                              | 2 | Bdnf,Grm5         |

References:

1. Mercadante AZ (2007) 4.2 Carotenoids in foods: sources and stability during processing and storage. *Food Color. Chem. Funct. Prop.* 213:
2. Saxena A, Raveh L, Ashani Y, Doctor B (1997) Structure of glycan moieties responsible for the extended circulatory life time of fetal bovine serum acetylcholinesterase and equine serum butyrylcholinesterase. *Biochemistry* 36:7481–7489
3. Rosenfeld CS, Ferguson SA (2014) Barnes maze testing strategies with small and large rodent models. *J Vis Exp JoVE* e51194
4. Seibenhener ML, Wooten MC (2015) Use of the Open Field Maze to measure locomotor and anxiety-like behavior in mice. *J Vis Exp JoVE* e52434
5. Sestakova N, Puzserova A, Kluknavsky M, Bernatova I (2013) Determination of motor activity and anxiety-related behaviour in rodents: methodological aspects and role of nitric oxide. *Interdiscip Toxicol* 6:126–135
